# Supplementary material for: Similar levels of gene content variation observed for Pseudomonas syringae populations extracted from single and multiple host species
Source: PubMed Central journal article supplement (PMC5589212; doi:10.1371/journal.pone.0184195), 2017-09-07

Fig. S4

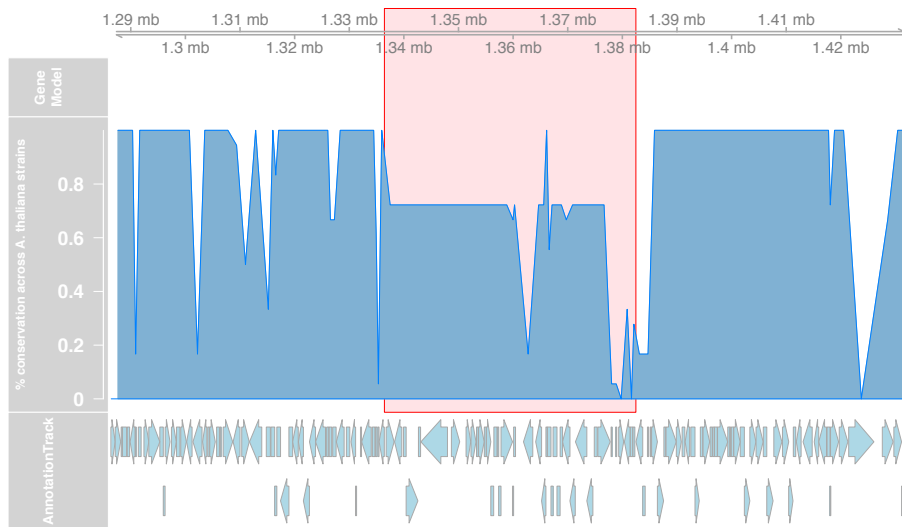

Supplement: pone.0184195.s004.pdf [file pone.0184195.s004.pdf]
