# Supplementary material for: Similar levels of gene content variation observed for Pseudomonas syringae populations extracted from single and multiple host species
Source: PubMed Central journal article supplement (PMC5589212; doi:10.1371/journal.pone.0184195), 2017-09-07
Supplement: pone.0184195.s005.pdf [file pone.0184195.s005.pdf]

Table S1: **Location of isolation for strains analyzed in this study.** Information was not available for several strains (listed as "NA"). When non-specific isolation information was provided by collector (such as country of origin), the latitude of country is provided. LMC is an abbreviation for Lake Michigan College.

| Strain       | Host            | Location of Isolation        | Latitude | Longitude | Reference                        |
|--------------|-----------------|------------------------------|----------|-----------|----------------------------------|
| Pph1448a     | French bean     | Ethiopia                     | 9.50     | 36.90     | (Joardar <i>et al.</i> , 2005)   |
| PsyB728a     | Snap bean       | Wisconsin, USA               | 44.5     | -89.50    | (Feil <i>et al.</i> , 2005)      |
| PtoDC3000    | Tomato          | Channel Islands, UK          | 49.47    | 2.58      | (Buell <i>et al.</i> , 2003)     |
| PtoMax13     | Tomato          | France                       | 46.00    | 2.00      | Unpubl.                          |
| PtoNCPB1108  | Tomato          | UK                           | 53.11    | 2.58      | (Cai <i>et al.</i> , 2011)       |
| Pmp          | Plum            | NA                           | NA       | NA        | (Baltrus <i>et al.</i> , 2011)   |
| Pla107       | Cucumber        | Gunma, Japan                 | 36.37    | 139.12    | (Baltrus <i>et al.</i> , 2011)   |
| Pmo          | Mulberry        | NA                           | NA       | NA        | (Baltrus <i>et al.</i> , 2011)   |
| Pja          | Barley          | Tochigi, Japan               | 36.52    | 139.82    | (Baltrus <i>et al.</i> , 2011)   |
| PpiR6        | Pea             | France                       | 46.00    | 2.00      | (Baltrus <i>et al.</i> , 2011)   |
| Pma          | Radish          | NA                           | NA       | NA        | (Baltrus <i>et al.</i> , 2011)   |
| Pan          | Kiwi            | NA                           | NA       | NA        | (Baltrus <i>et al.</i> , 2011)   |
| Pla106       | Cucumber        | Shizuoka, Japan              | 34.97    | 138.37    | (Baltrus <i>et al.</i> , 2011)   |
| Ptt          | Sugar beet      | NA                           | NA       | NA        | (Baltrus <i>et al.</i> , 2011)   |
| Pac          | Maple tree      | USA                          | 40.42    | -98.7372  | (Baltrus <i>et al.</i> , 2011)   |
| Pta          | Tobacco         | NA                           | NA       | NA        | (Baltrus <i>et al.</i> , 2011)   |
| PgyB076      | Soy bean        | Champaign, IL, USA           | 40.12    | -88.24    | (Qi <i>et al.</i> , 2011)        |
| PgyR4        | Soy bean        | NA                           | NA       | NA        | (Baltrus <i>et al.</i> , 2011)   |
| Pae          | Horse chestnut  | India                        | 21.77    | 78.87     | (Baltrus <i>et al.</i> , 2011)   |
| T1           | Tomato          | Canada                       | 56.76    | -86.42    | (Almeida <i>et al.</i> , 2008)   |
| K40          | Tomato          | Virginia, USA                | 37.67    | -78.61    | (Cai <i>et al.</i> , 2011)       |
| Por1-6       | Rice            | NA                           | NA       | NA        | (Reinhardt <i>et al.</i> , 2009) |
| DM2.1.12.02A | Mouse-ear cress | Jasper County, IN, USA       | 41.19    | -87.11    | This study                       |
| LMC.P10      | Mouse-ear cress | LMC, MI, USA                 | 42.10    | -86.39    | This study                       |
| LMC.P80      | Mouse-ear cress | LMC, MI, USA                 | 42.10    | -86.39    | This study                       |
| LMC.P91      | Mouse-ear cress | LMC, MI, USA                 | 42.10    | -86.39    | This study                       |
| KN2.a.3      | Mouse-ear cress | Starke County, IN, USA       | 41.27    | -86.63    | This study                       |
| Knox623a     | Mouse-ear cress | Starke County, IN, USA       | 41.27    | -86.63    | This study                       |
| Knox652c     | Mouse-ear cress | Starke County, IN, USA       | 41.27    | -86.63    | This study                       |
| NI.P123      | Mouse-ear cress | North Liberty, USA           | 41.53    | -86.43    | This study                       |
| NP29.1a      | Mouse-ear cress | Berrien County, MI, USA      | 42.09    | -86.33    | This study                       |
| LP217a       | Mouse-ear cress | La Porte, Indiana, USA       | 41.69    | -86.85    | This study                       |
| LP221b       | Mouse-ear cress | La Porte, Indiana, USA       | 41.69    | -86.85    | This study                       |
| LP868.1a     | Mouse-ear cress | La Porte, Indiana, USA       | 41.69    | -86.85    | This study                       |
| RM.P66       | Mouse-ear cress | Route Marker, USA            | 41.36    | -86.74    | This study                       |
| RMX.24.a.1   | Mouse-ear cress | Berrien County, MI, USA      | 42.04    | -86.51    | This study                       |
| RM.P20       | Mouse-ear cress | Route Marker, USA            | 41.36    | -86.74    | This study                       |
| RMX815.1a    | Mouse-ear cress | Berrien County, MI, USA      | 42.04    | -86.51    | This study                       |
| ME812.2b     | Mouse-ear cress | Michigan Extension site, USA | 42.09    | -86.36    | This study                       |
| LP205a       | Mouse-ear cress | La Porte, Indiana, USA       | 41.69    | -86.85    | This study                       |
