# Supplementary material for: Similar levels of gene content variation observed for Pseudomonas syringae populations extracted from single and multiple host species
Source: PubMed Central journal article supplement (PMC5589212; doi:10.1371/journal.pone.0184195), 2017-09-07
Supplement: pone.0184195.s006.pdf [file pone.0184195.s006.pdf]

Table S2: Genes unique to and conserved in group II. This table shows the position in the B728a genome of each of the genes unique to group II. Fifty six genes were conserved in 90% or more of the strains in group II, but absent outside group II. 29% of these genes lie in the syringomycin/syringopeptin biosynthetic cluster, highlighted in Cyan.

| Start   | End     | Function                                                                               |
|---------|---------|----------------------------------------------------------------------------------------|
| 419054  | 419746  | Polyhydroxyalkanoate granule-associated protein PhaF                                   |
| 871698  | 870682  | Glucanotransferase (EC 3.1.1.17)                                                       |
| 872972  | 873892  | transcriptional regulator, LysR family                                                 |
| 874861  | 874418  | hypothetical protein                                                                   |
| 875334  | 874876  | FIG00963335: hypothetical protein                                                      |
| 996403  | 995840  | acetyltransferase, GNAT family                                                         |
| 1023614 | 1023483 | FIG00959449: hypothetical protein                                                      |
| 1030545 | 1029403 | L-lactate dehydrogenase (EC 1.1.2.3)                                                   |
| 1030676 | 1031572 | LysR family regulatory protein CidR                                                    |
| 1281770 | 1281967 | FIG00958976: hypothetical protein                                                      |
| 1566775 | 1566948 | FIG00966404: hypothetical protein                                                      |
| 1734939 | 1735520 | DedA family inner membrane protein YohD                                                |
| 1755166 | 1754198 | luciferase family protein                                                              |
| 1892673 | 1893737 | FOG: GGDEF domain                                                                      |
| 2547726 | 2546254 | Outer membrane component of tripartite multidrug resistance system                     |
| 2547814 | 2548428 | Transcriptional regulator, TetR family                                                 |
| 2548506 | 2549609 | RND efflux membrane fusion protein                                                     |
| 2688569 | 2688441 | hypothetical protein                                                                   |
| 2730832 | 2731044 | FIG00957523: hypothetical protein                                                      |
| 2805336 | 2805578 | lipoprotein, putative                                                                  |
| 3056307 | 3055600 | regulatory protein, LuxR                                                               |
| 3057159 | 3058328 | Macrolide-specific efflux protein MacA                                                 |
| 3058574 | 3059179 | FIG00957335: hypothetical protein                                                      |
| 3060160 | 3060008 | FIG00956999: hypothetical protein                                                      |
| 3061643 | 3060225 | RND efflux system, outer membrane lipoprotein CmeC                                     |
| 3091068 | 3062695 | Long-chain-fatty-acid-CoA ligase (EC 6.2.1.3)                                          |
| 3092679 | 3091468 | Predicted hydrolases or acyltransferases (alpha/beta hydrolase superfamily)            |
| 3093683 | 3092751 | CmaB                                                                                   |
| 3095545 | 3093701 | Long-chain-fatty-acid-CoA ligase (EC 6.2.1.3)                                          |
| 3095877 | 3096938 | Non-ribosomal peptide synthetase modules, pyoverdine                                   |
| 3097019 | 3098719 | ABC-type hydroxamate-type ferric siderophore transporter, ATP-binding protein          |
| 3172404 | 3173561 | Macrolide-specific efflux protein MacA                                                 |
| 3173564 | 3175525 | Macrolide export ATP-binding/permease protein MacB (EC 3.6.3.-)                        |
| 3177074 | 3175740 | Siderophore biosynthesis diaminobutyrate-2-oxoglutarate aminotransferase (EC 2.6.1.76) |

Continued on next page

Table S2 – Continued from previous page

| Start   | End     | Function                                                                     |
|---------|---------|------------------------------------------------------------------------------|
| 3177351 | 3178781 | Outer membrane component of tripartite multidrug resistance system           |
| 3178778 | 3179881 | PUTATIVE CATION-EFFLUX SYSTEM SIGNAL PEPTIDE PROTEIN                         |
| 3206174 | 3205149 | Homoserine O-acetyltransferase (EC 2.3.1.31)                                 |
| 3243182 | 3242289 | LysR family transcriptional regulator clustered with dicarboxylate transport |
| 3243314 | 3244606 | Uncharacterized transporter, similarity to citrate transporter               |
| 3244607 | 3245971 | Protein of unknown function DUF1446                                          |
| 3245968 | 3246330 | Small uncharacterized protein pro4170                                        |
| 3263539 | 3262145 | Uncharacterized iron-regulated membrane protein; Iron-uptake factor PiuB     |
| 3263836 | 3263648 | hypothetical protein                                                         |
| 3432085 | 3431795 | FIG00960182: hypothetical protein                                            |
| 3763830 | 3763711 | hypothetical protein                                                         |
| 3813654 | 3813932 | Cold shock protein CspD                                                      |
| 4298907 | 4298794 | hypothetical protein                                                         |
| 4316808 | 4316446 | competence protein, putative                                                 |
| 4501194 | 4501826 | thioredoxin domain protein                                                   |
| 4785405 | 4785205 | FIG00955586: hypothetical protein                                            |
| 4938236 | 4938102 | FIG00960679: hypothetical protein                                            |
| 5030649 | 5030455 | conserved domain protein                                                     |
| 5231095 | 5231568 | Conserved domain protein                                                     |
| 5258977 | 5259249 | FIG00955051: hypothetical protein                                            |
| 5276341 | 5275643 | FIG00959965: hypothetical protein                                            |
| 5600755 | 5594942 | hypothetical protein                                                         |
